# Supplementary material
Source: publisher figshare collection journal article supplement (https://karger.figshare.com/articles/dataset/_/21916137)
Supplement: Supplementary file 1 [file 1]

**Online Supplementary Table S3. Health-related quality-of-life scores as determined using the QLQ-C30 and QLQ-LC13 questionnaires**. Baseline scores (absolute values) and longitudinal change (change in standardized score versus baseline (pre-procedure) of all QLQ-C30 and QLQ-LC13 functional scales and symptoms. For global health status/QOL and functional scales, a high score indicates better functioning; for symptom scales, a high score represents a high level of symptoms.

|  | **Standardized score** | | |  | | **Post-procedure**  **change in standardized score vs. baseline** | | | | | | | | | | | | | | | | |
| --- | --- | --- | --- | --- | --- | --- | --- | --- | --- | --- | --- | --- | --- | --- | --- | --- | --- | --- | --- | --- | --- | --- |
|  | Baseline N=10 | | |  | | Day 1 N=10 | | |  | | Month 1 N=9 | | |  | | Month 6 N=9 | | |  | | Month 12 N=8 | |
| **EORTC QLQ-C30, median (range)** |  |  |  | |  | |  |  | |  | |  |  | |  | |  |  | |  | |  |
| Global health status/QoL | 67 | (25, 100) |  | | 0 | | (0, 42) |  | | 0 | | (-25, 33) |  | | 0 | | (-17, 25) |  | | 13 | | (-33, 42) |
| Physical functioning | 87 | (60, 100) |  | | 0 | | (-7, 7) |  | | 0 | | (-13, 7) |  | | 0 | | (-20, 13) |  | | 0 | | (-33, 13) |
| Role functioning | 75 | (50, 100) |  | | 0 | | (-33, 17) |  | | 0 | | (-33, 33) |  | | 0 | | (-17, 33) |  | | -9 | | (-50, 33) |
| Emotional functioning | 87.5 | (67, 100) |  | | 0 | | (-8, 17) |  | | 0 | | (-33, 25) |  | | -8 | | (-25, 17) |  | | 0 | | (-25, 33) |
| Cognitive functioning | 83 | (67, 100) |  | | 0 | | (0, 17) |  | | 0 | | (-17, 33) |  | | 0 | | (-33, 17) |  | | 0 | | (-17, 33) |
| Social functioning | 91.5 | (50, 100) |  | | 0 | | (-33, 50) |  | | 0 | | (-50, 17) |  | | 0 | | (-17, 17) |  | | 0 | | (-100, 0) |
| Fatigue | 27.5 | (0, 44) |  | | 0 | | (-33, 22) |  | | 0 | | (-33, 39) |  | | 11 | | (-33, 22) |  | | 11 | | (-33, 44) |
| Nausea and vomiting | 0 | (0, 17) |  | | 0 | | (0, 0) |  | | 0 | | (0, 17) |  | | 0 | | (0, 17) |  | | 0 | | (0, 0) |
| Pain | 25 | (0, 50) |  | | 0 | | (0, 17) |  | | 0 | | (-33, 17) |  | | 0 | | (-33, 33) |  | | 8.5 | | (0, 83) |
| Dyspnea | 16.5 | (0, 33) |  | | 0 | | (0, 33) |  | | 0 | | (-33, 33) |  | | 0 | | (-33, 33) |  | | 0 | | (-33, 33) |
| Insomnia | 0 | (0, 67) |  | | 0 | | (-33, 67) |  | | 0 | | (-33, 33) |  | | 0 | | (-33, 33) |  | | 0 | | (-33, 33) |
| Appetite loss | 0 | (0, 33) |  | | 0 | | (0, 0) |  | | 0 | | (-33, 0) |  | | 0 | | (-33, 0) |  | | 0 | | (-33, 33) |
| Constipation | 0 | (0, 33) |  | | 0 | | (-33, 0) |  | | 0 | | (-33, 0) |  | | 0 | | (-33, 33) |  | | 0 | | (-33, 0) |
| Diarrhea | 0 | (0, 33) |  | | 0 | | (0, 0) |  | | 0 | | (-33, 0) |  | | 0 | | (-33, 33) |  | | 0 | | (0, 33) |
| Financial difficulties | 0 | (0, 33) |  | | 0 | | (-33, 33) |  | | 0 | | (-33, 0) |  | | 0 | | (-33, 67) |  | | 0 | | (0, 0) |
|  |  |  |  | |  | |  |  | |  | |  |  | |  | |  |  | |  | |  |
| **EORTC QLQ-LC13, median (range)** | |  |  | |  | |  |  | |  | |  |  | |  | |  |  | |  | |  |
| Dyspnea | 22 | (0, 44) |  | | 0* | | (-11, 22)* |  | | 0 | | (-22, 44) |  | | 0 | | (-22, 33) |  | | -11 | | (-22, 67) |
| Coughing | 33 | (0, 33) |  | | 0 | | (0, 33) |  | | 0 | | (0, 100) |  | | 0 | | (-33, 0) |  | | 0 | | (-33, 33) |
| Hemoptysis | 0 | (0, 33) |  | | 0 | | (0, 33) |  | | 0 | | (0, 0) |  | | 0 | | (-33, 0) |  | | 0 | | (-33, 0) |
| Sore mouth | 0 | (0, 33) |  | | 0 | | (-33, 0) |  | | 0 | | (-33, 33) |  | | 0 | | (-33, 33) |  | | 0 | | (-33, 0) |
| Dysphagia | 0 | (0, 0) |  | | 0 | | (0, 33) |  | | 0 | | (0, 0) |  | | 0 | | (0, 33) |  | | 0 | | (0, 0) |
| Peripheral neuropathy | 0 | (0, 100) |  | | 0 | | (-33, 67) |  | | 0 | | (-33, 33) |  | | 0 | | (0, 67) |  | | 0 | | (-33, 67) |
| Alopecia | 0 | (0, 33) |  | | 0 | | (-33, 33) |  | | 0 | | (0, 0) |  | | 0 | | (0, 0) |  | | 0 | | (0, 33) |
| Pain in chest | 0 | (0, 33) |  | | 0 | | (0, 0) |  | | 0 | | (0, 67) |  | | 0 | | (0, 33) |  | | 0 | | (0, 0) |
| Pain in arm or shoulder | 0 | (0, 33) |  | | 0 | | (-33, 33) |  | | 0 | | (-33, 67) |  | | 0 | | (-33, 33) |  | | 0 | | (-33, 67) |
| Pain in other parts | 33 | (0, 100) |  | | 0 | | (-33, 33) |  | | 0 | | (-33, 33) |  | | 0 | | (-33, 33) |  | | 0 | | (0, 33) |
| * N=8 |  |  |  | |  | |  |  | |  | |  |  | |  | |  |  | |  | |  |
